# Supplementary material for: Anisotropy and thermal properties in GeTe semiconductor by Raman analysis
Source: Royal Society of Chemistry journal article supplement (doi:10.1039/d3nr02678g), 2023-01-01
Supplement: d3nr02678g1.pdf [file d3nr02678g1.pdf]

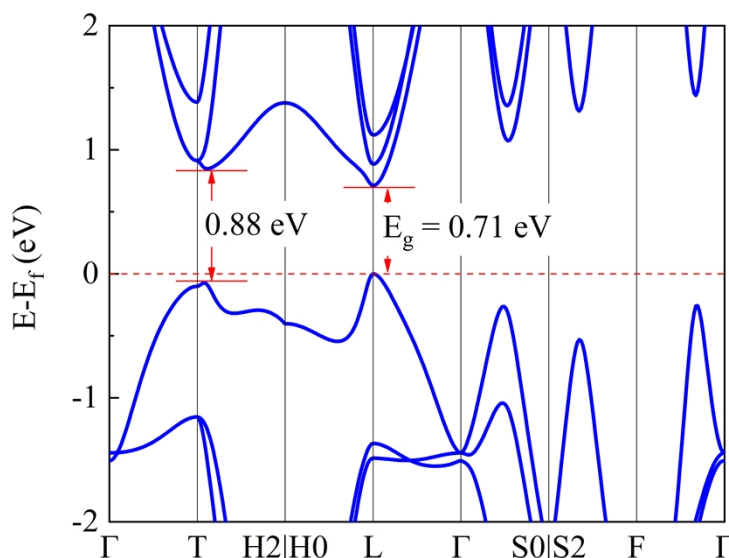

Fig. S1 The electronic band structure of bulk-GeTe by our first-principles calculations.

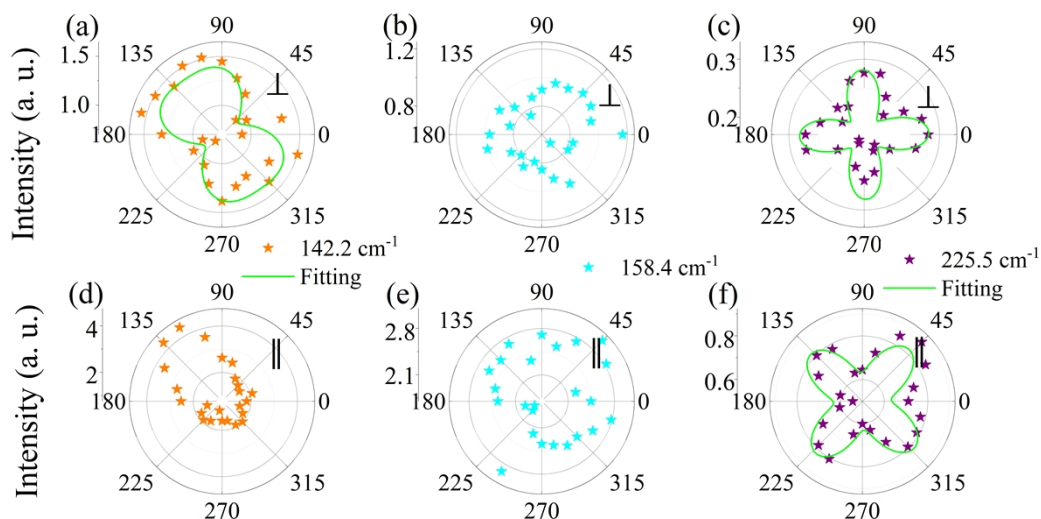

Fig. S2 (a)-(f) Polarization angle dependent Raman peak intensities at 142.2  $\text{cm}^{-1}$ , 158.4  $\text{cm}^{-1}$ , and 225.5  $\text{cm}^{-1}$  under the parallel or cross configurations. Stars - experimental data, curves - fit results.

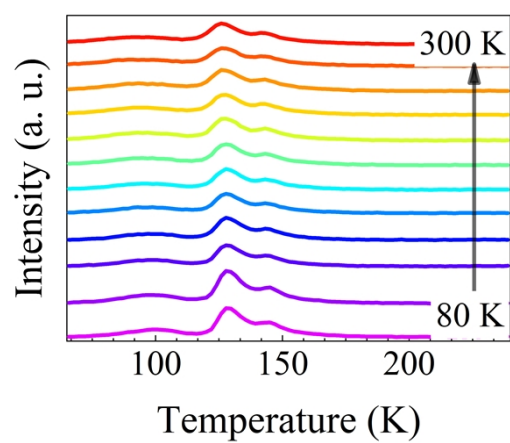

Fig. S3 Raman spectra of GeTe at 80 K-300 K where the step of temperature increase is 20 K.
